# Supplementary material for: Highly expressed centromere protein L indicates adverse survival and associates with immune infiltration in hepatocellular carcinoma
Source: PubMed Central journal article supplement (PMC8544325; doi:10.18632/aging.203574), 2021-10-04
Supplement: aging-13-203574-s001.pdf [file aging-13-203574-s001.pdf]

**SUPPLEMENTARY FIGURES**

The gene expression profile across all tumor samples and paired normal tissues.(Dot plot)

Each dots represent expression of samples.

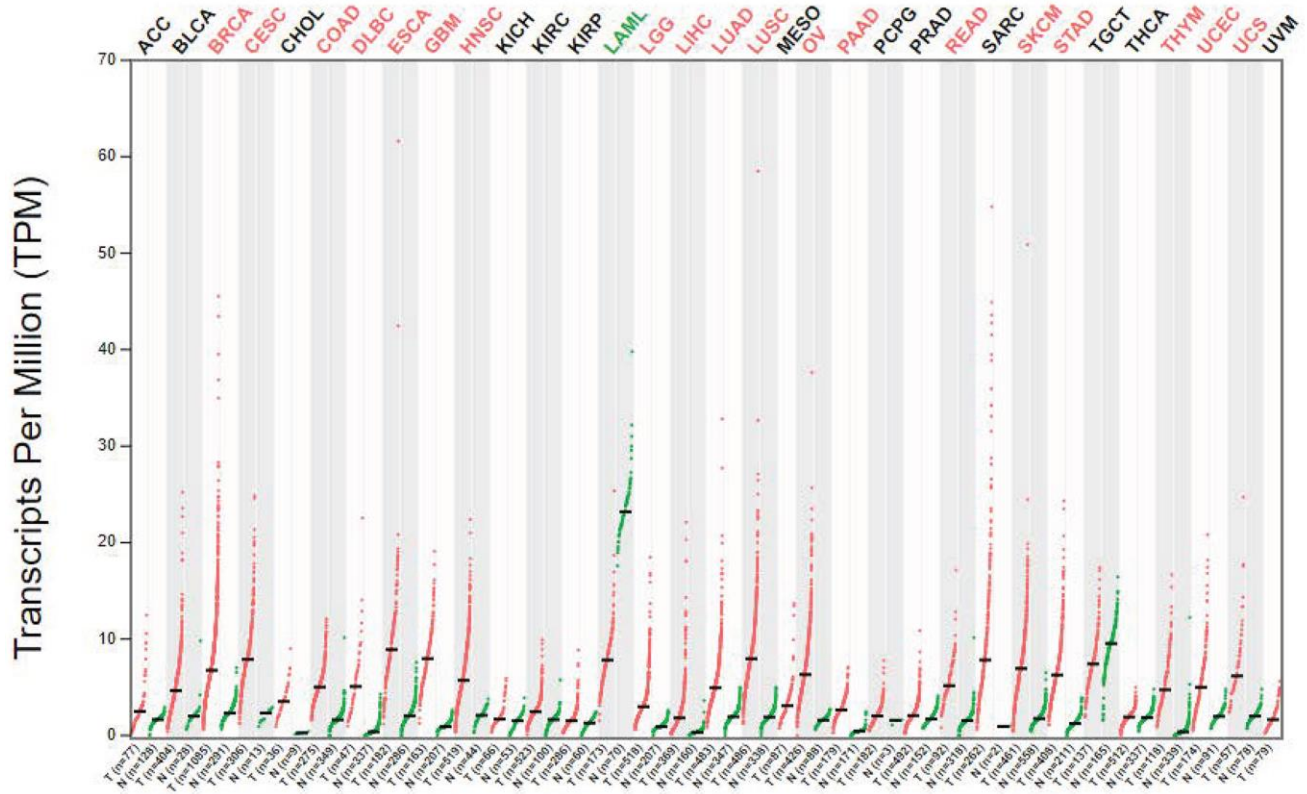

Supplementary Figure 1. The transcription level of CENPL in different tumor types by GEPIA.

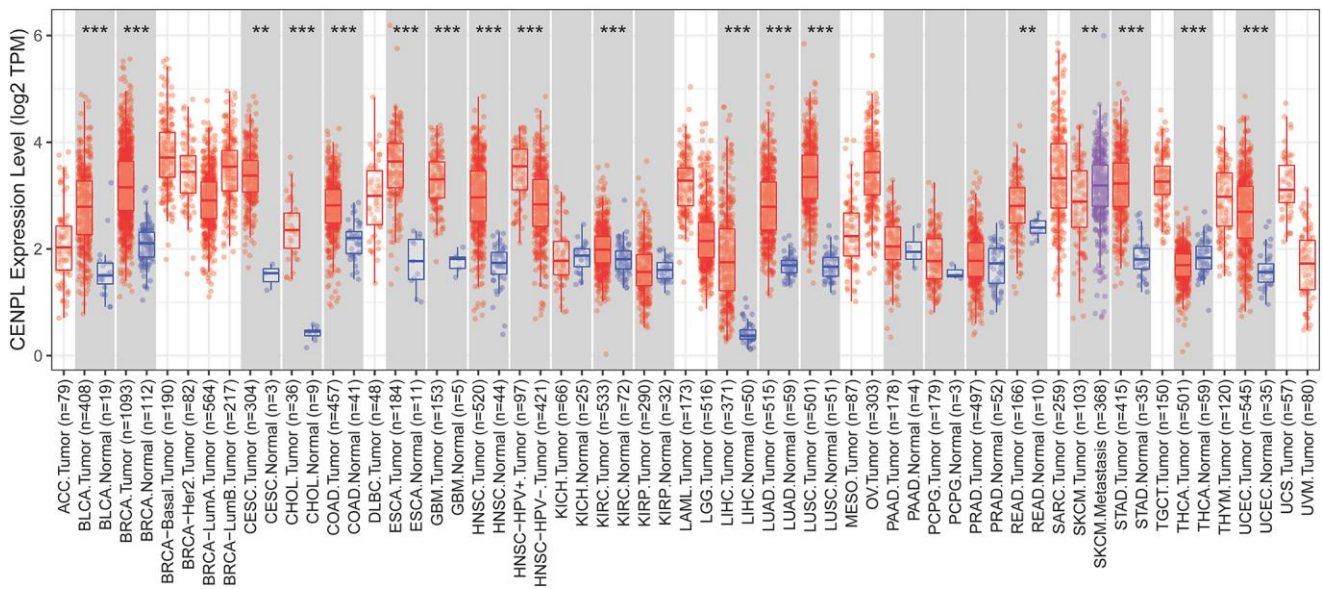

Supplementary Figure 2. The transcription level of CENPL in different tumor types through TIMER.

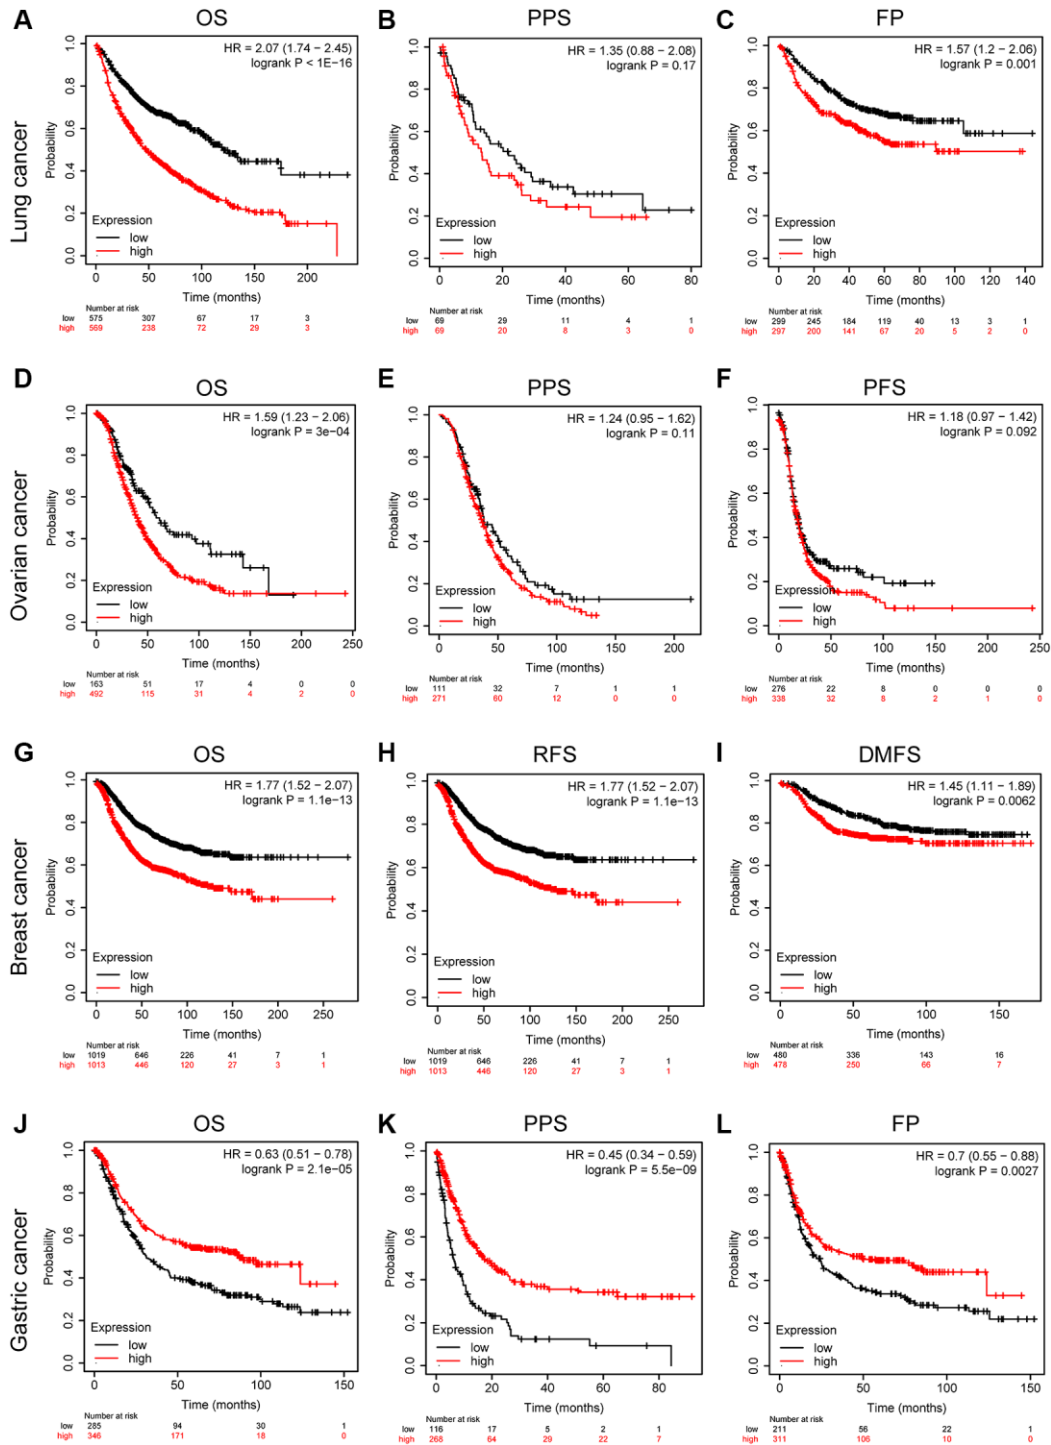

**Supplementary Figure 3. The effects of CENPL expression on the prognostic outcome of other tumor types. (A–C) Lung cancer; (D–F) Ovarian cancer; (G–I) Breast cancer, (J–L) Gastric cancer. Abbreviations: OS: overall survival; PPS: post progression survival; FP: first progression; PFS: progression-free survival; RFS: relapse-free survival; DMFS: distance metastasis free survival.**

The gene expression profile across all tumor samples and paired normal tissues.(Dot plot)

Each dots represent expression of samples.

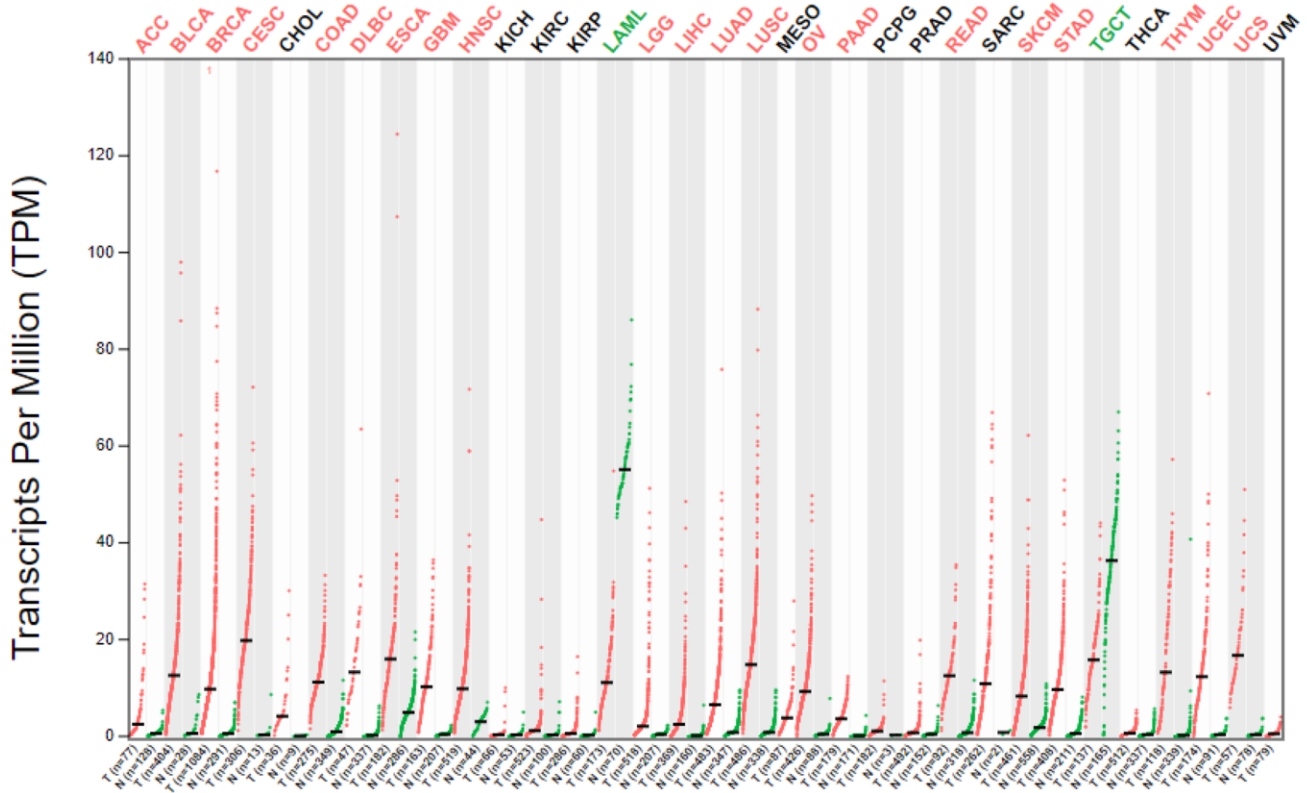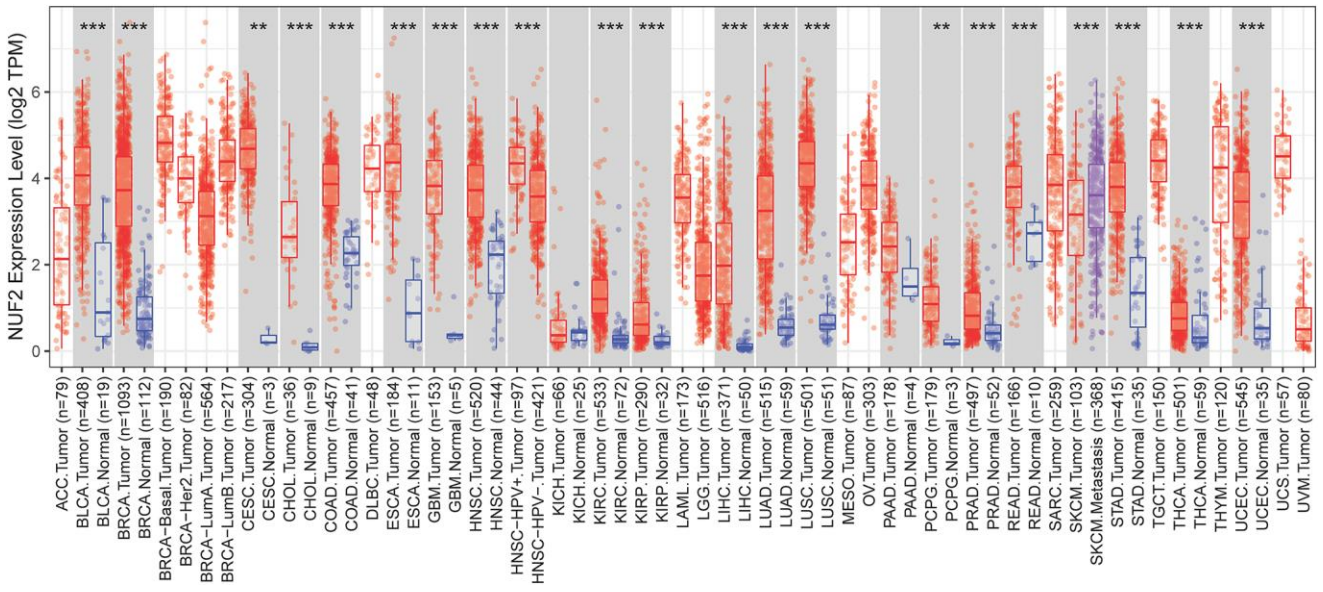

Supplementary Figure 4. The transcription level of Nuf2 in different tumor types through TIMER and GEPIA.

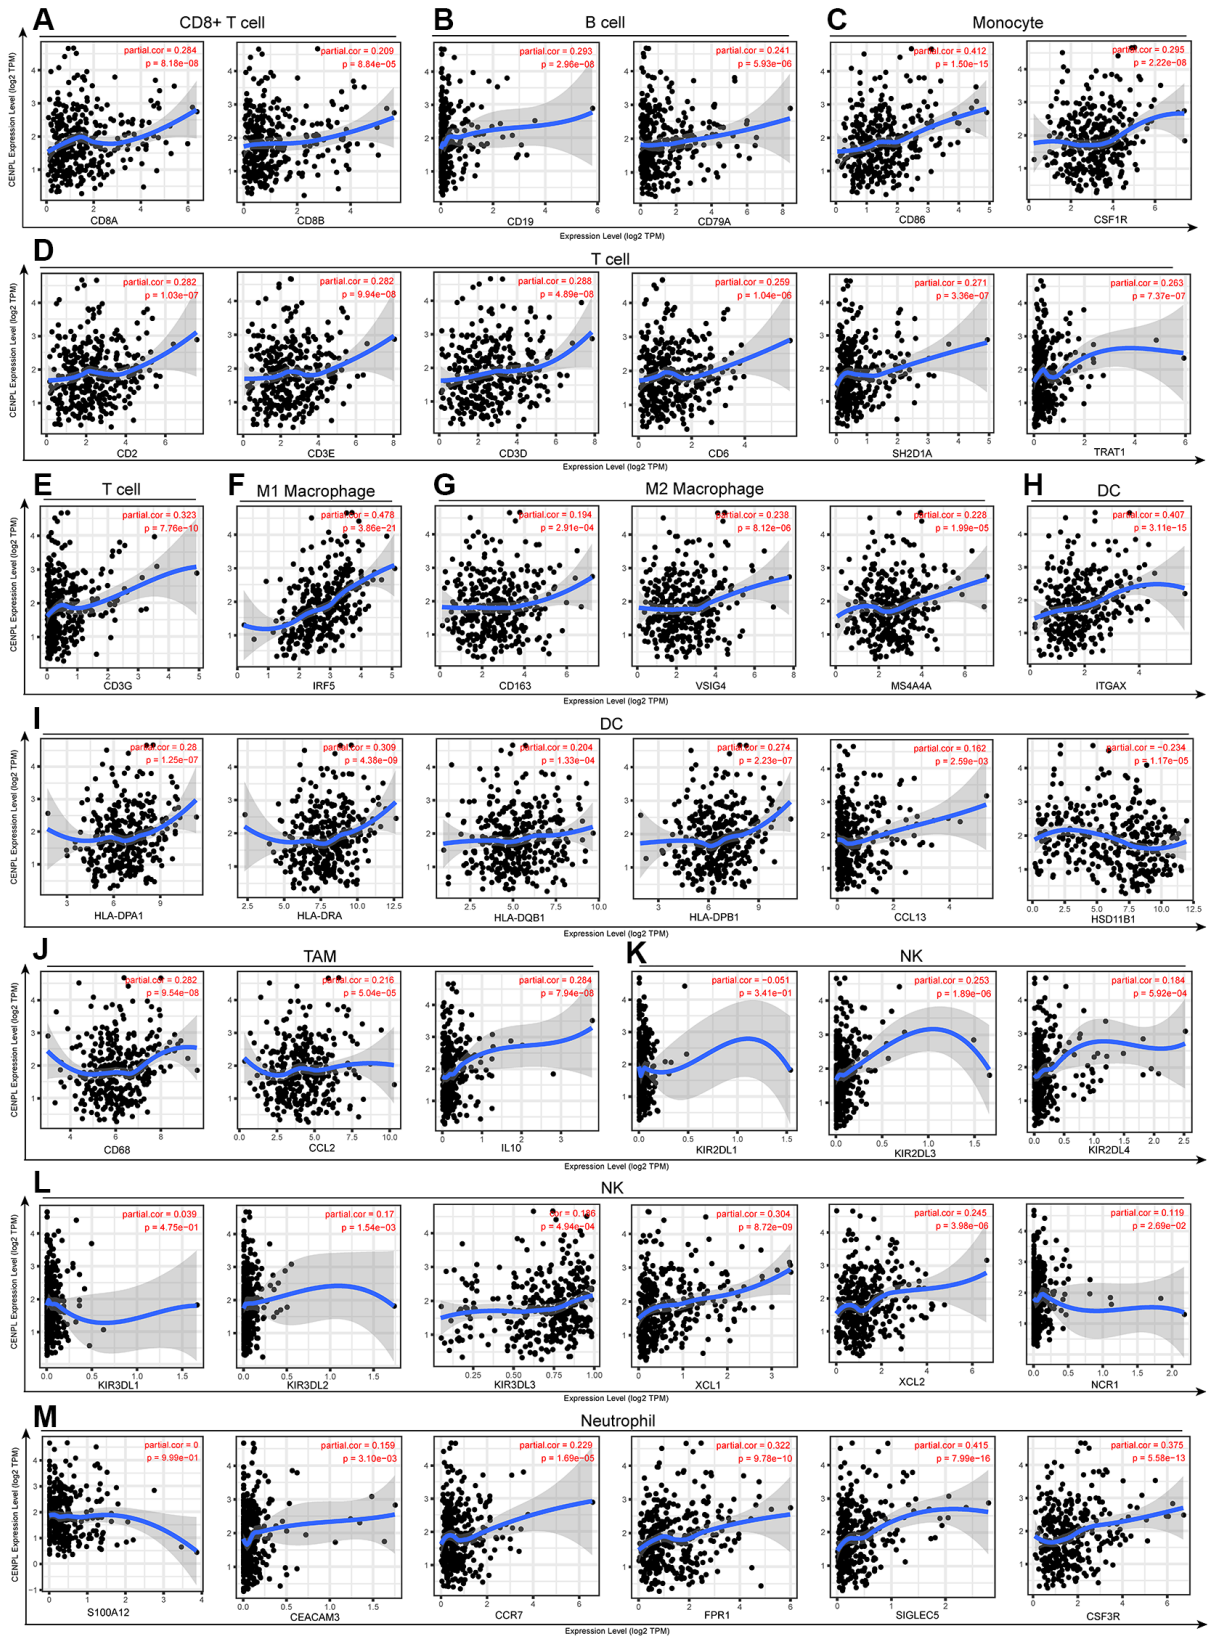

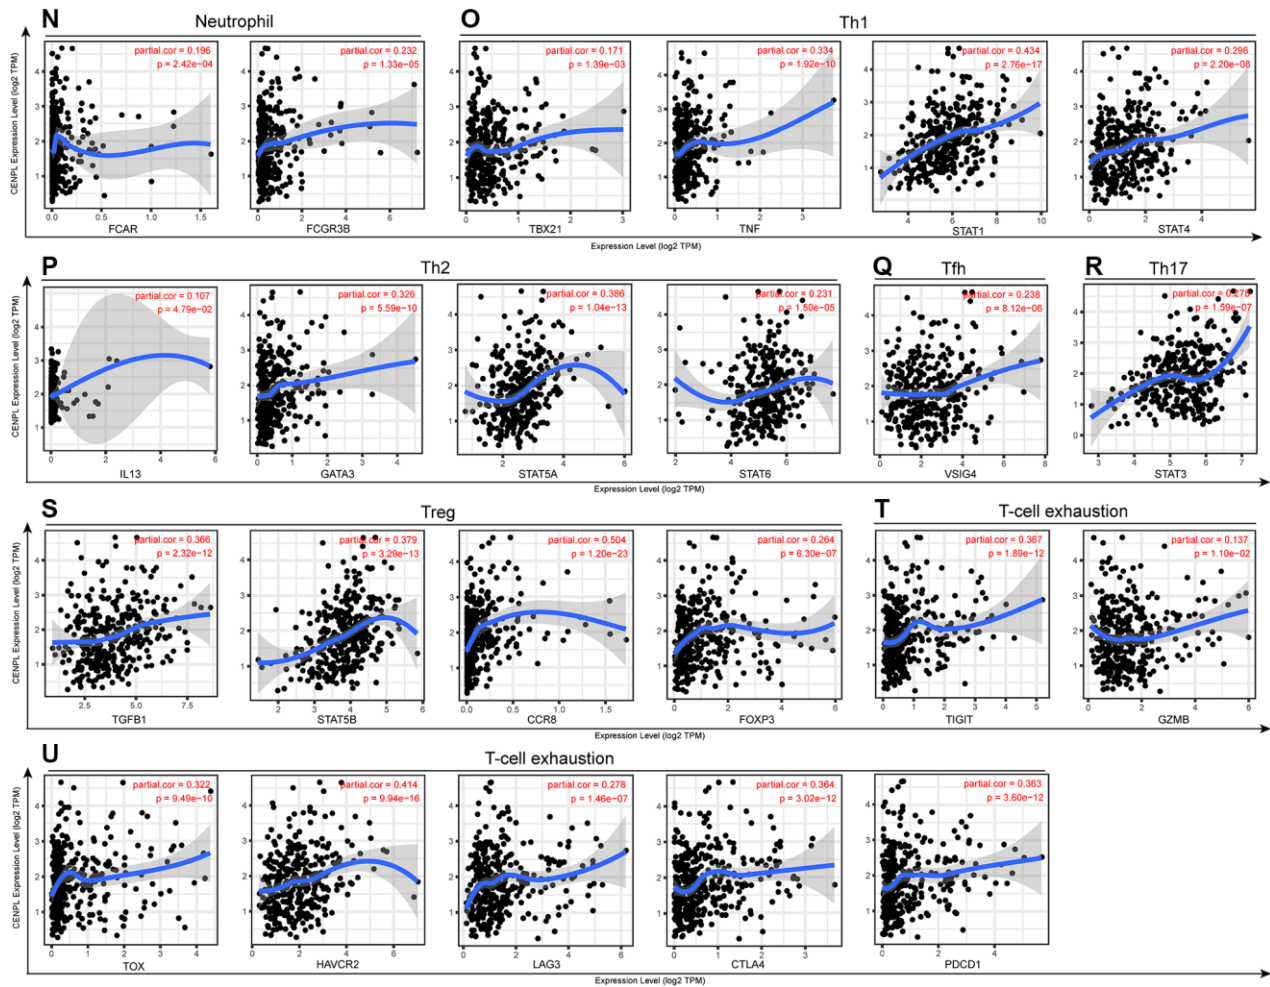

**Supplementary Figure 5. Association between CENPL transcription level and immune cell markers.** The association between CENPL transcription level and cell markers of (A) CD8+ T cell, (B) B cell, (C) Monocyte, (D–E) T cell, (F) M1 Macrophage, (G) M2 Macrophage, (H–I) DC, (J) TAM, (K–L) NK, (M–N) Neutrophil, (O) Th1, (P) Th2, (Q) Tfh, (R) Th17, (S) Treg, and (T–U) T-cell exhaustion. Abbreviations: DC: dendritic cell; TAM: tumor-associated macrophage; NK: natural killer cell; Th: T helper cell; Tfh: follicular helper T cell; Treg: regulatory T cell.
